# Supplementary material for: High-resolution continuous-flow analysis setup for water isotopic measurement from ice cores using laser spectroscopy
Source: Copernicus journal article supplement (doi:10.5194/amt-8-2869-2015), 2015-07-17
Supplement: Supplementary file 1 [file amt-8-2869-2015-supplement.pdf]

Supplement of Atmos. Meas. Tech., 8, 2869–2883, 2015  
<http://www.atmos-meas-tech.net/8/2869/2015/>  
doi:10.5194/amt-8-2869-2015-supplement  
© Author(s) 2015. CC Attribution 3.0 License.

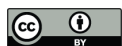

*Supplement of*

## **High-resolution continuous-flow analysis setup for water isotopic measurement from ice cores using laser spectroscopy**

**B. D. Emanuelsson et al.**

*Correspondence to:* B. D. Emanuelsson ([daniel.emmanuelsson@vuw.ac.nz](mailto:daniel.emmanuelsson@vuw.ac.nz))

The copyright of individual parts of the supplement might differ from the CC-BY 3.0 licence.

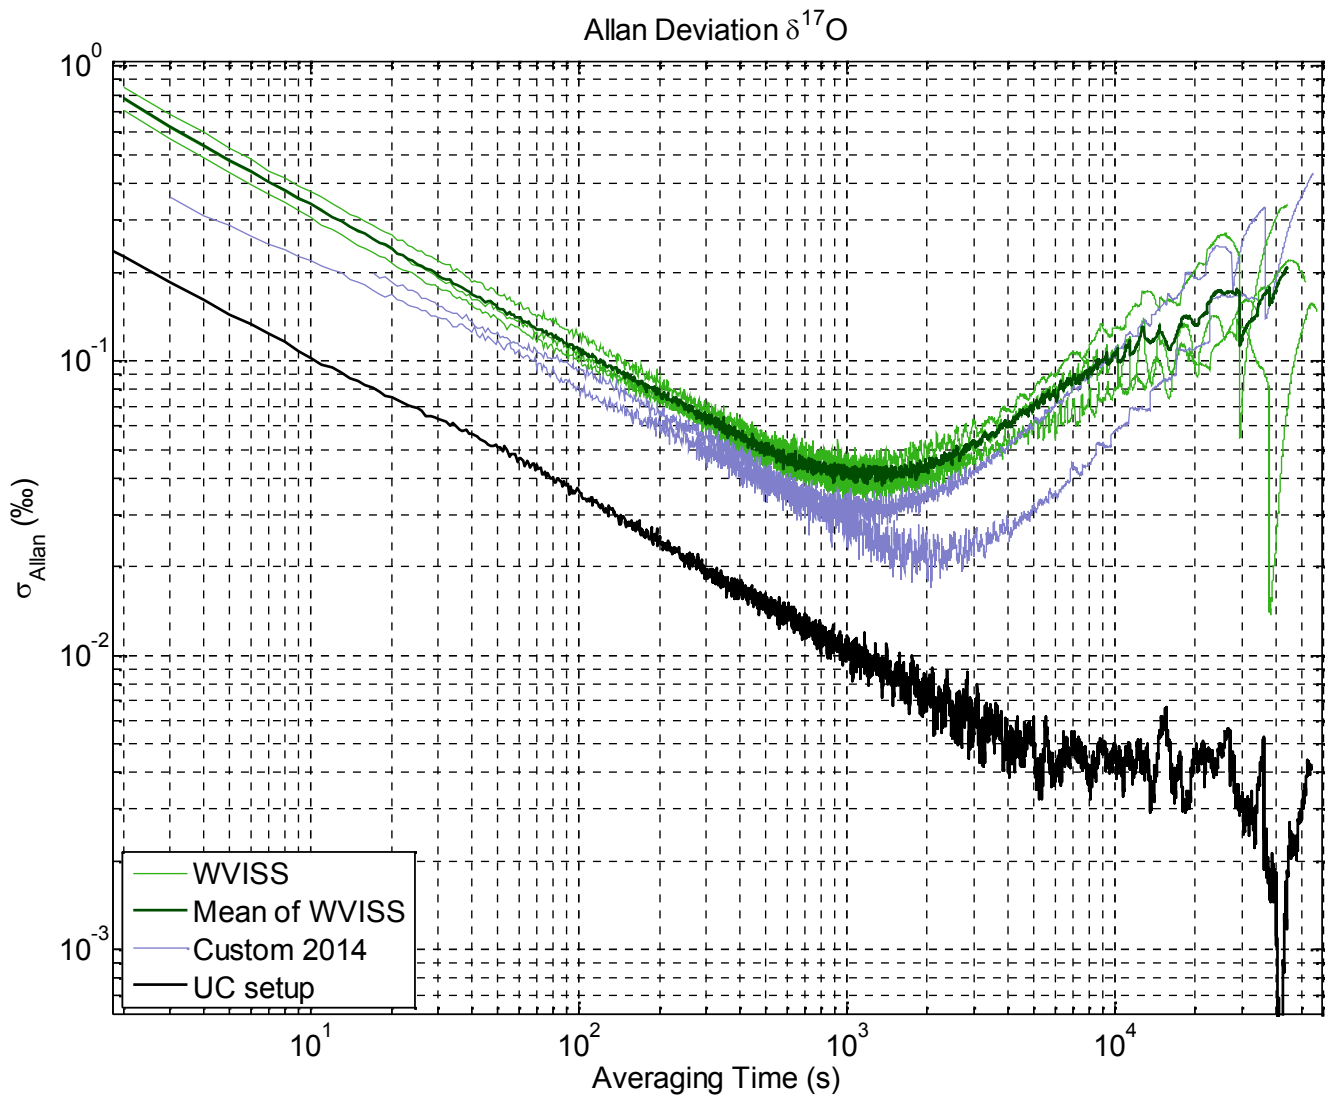

**Figure S1.** Allan deviation as a function of averaging time for  $^{17}\text{O}$  for stability tests on the WVISS (green lines), the custom 2014 (blue lines) and from the UC setup (black line).

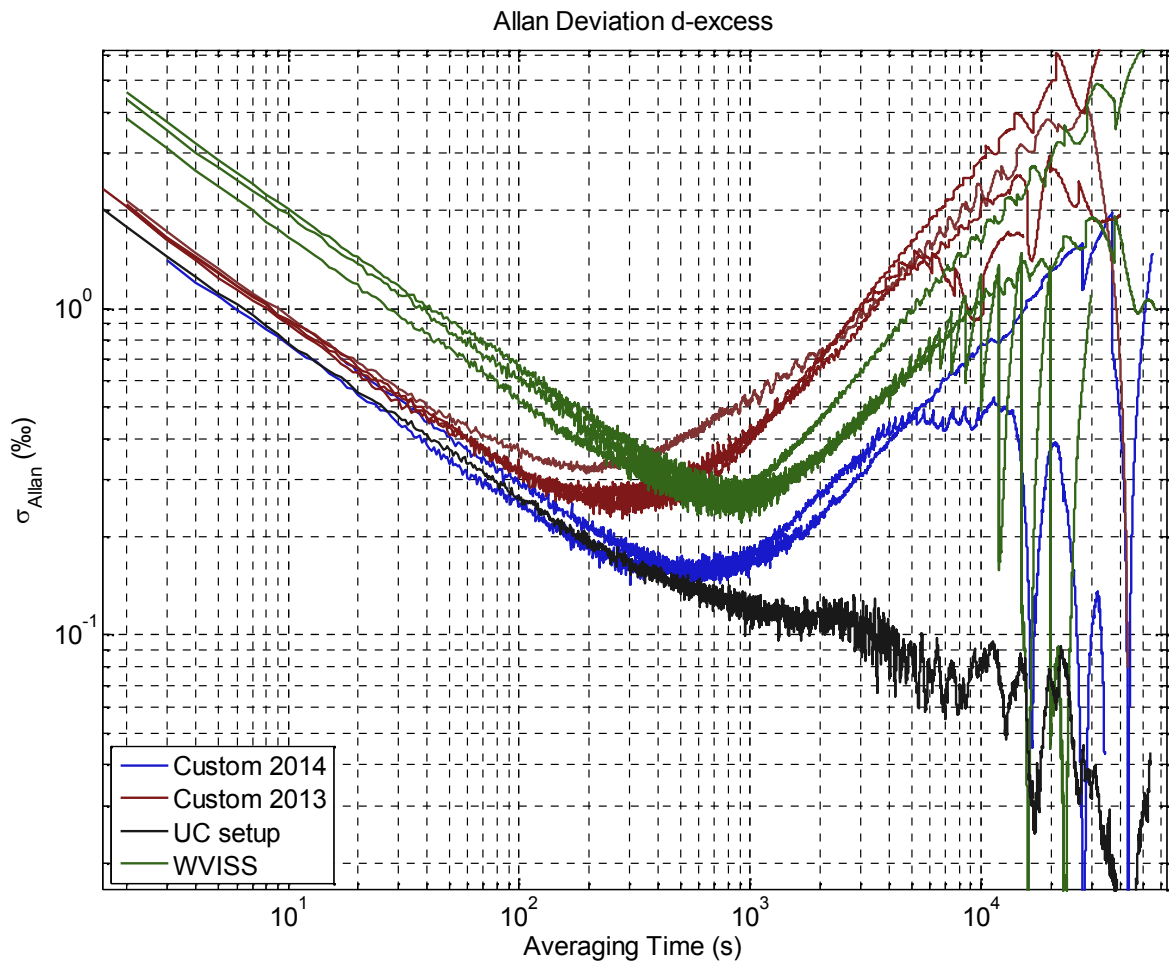

**Figure S2.** Allan deviation as a function of averaging time for d-excess for stability tests on the custom setups (2013 brown lines and 2014 blue lines), the WVISS (green lines), and from the UC setup (black line).
